# Supplementary material for: Correction: Endomucin selectively regulates vascular endothelial growth factor receptor-2 endocytosis through its interaction with AP2
Source: PubMed Central journal article supplement (PMC11155063; doi:10.1186/s12964-024-01696-6), 2024-06-06

# Supplementary Figure 1

## A

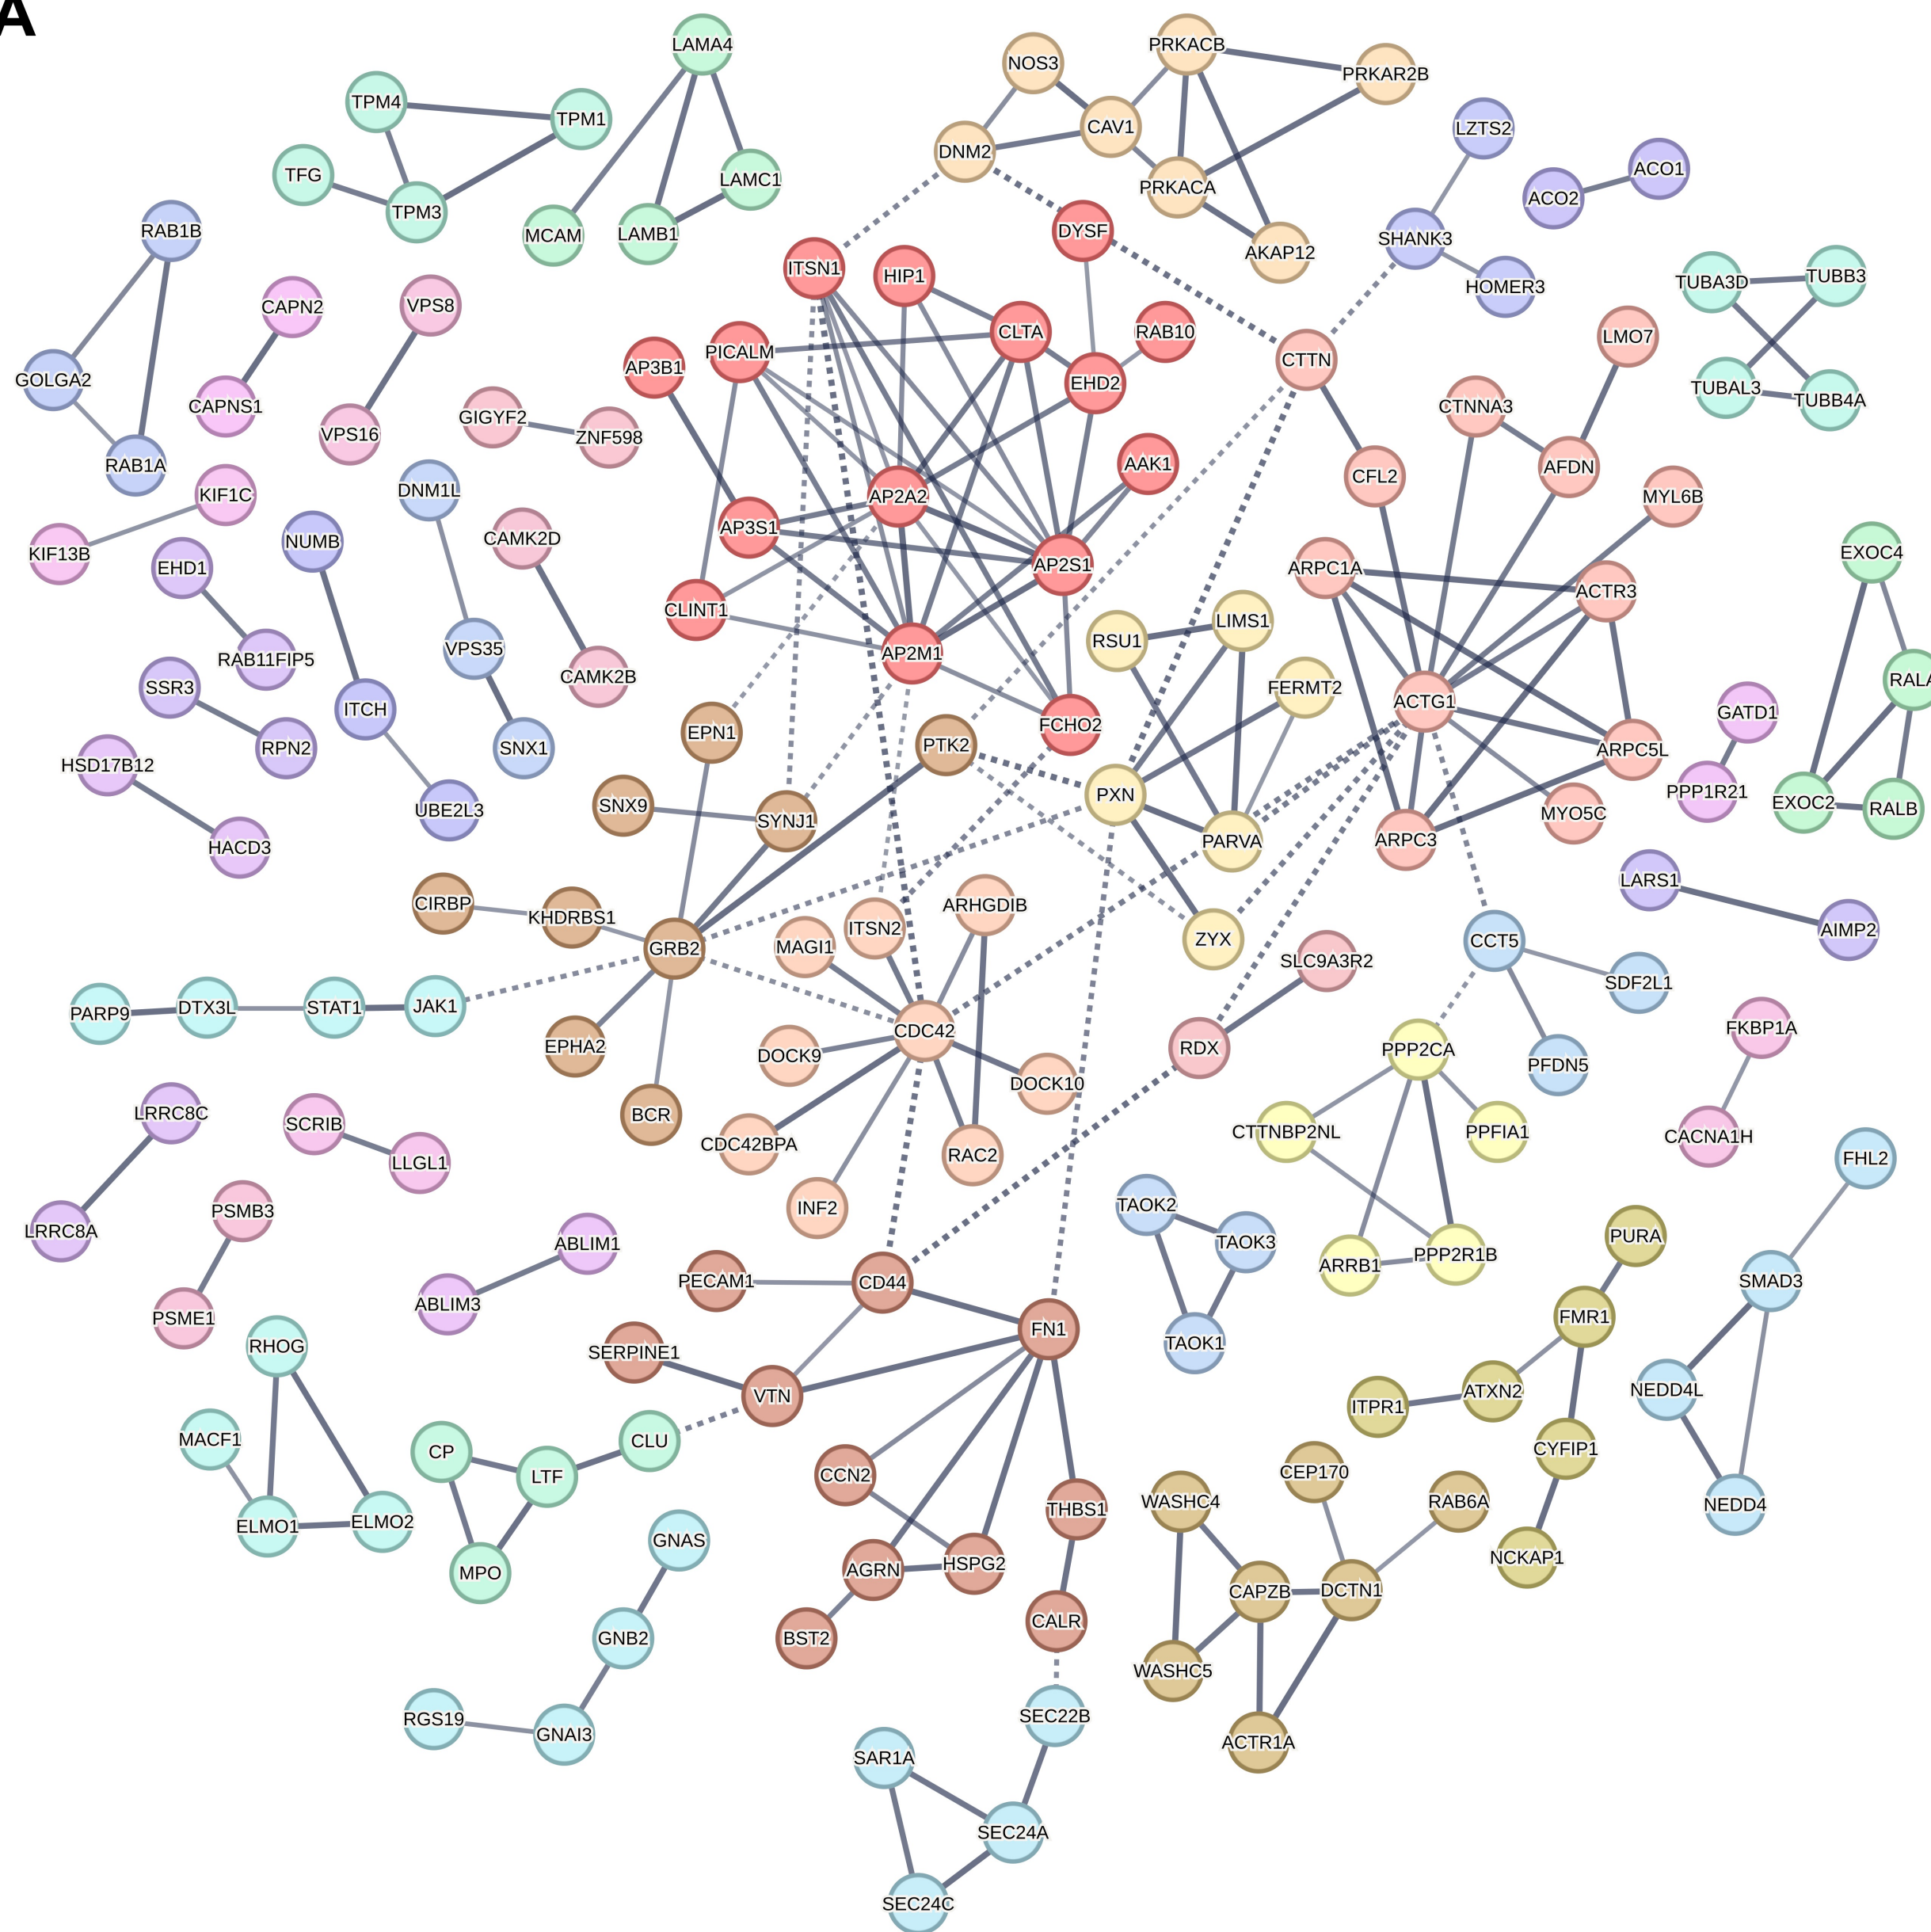

## B

**Top gene clusters**

| bubble                                     | gene count | gene ontology                                  | protein names                                                                            |
|--------------------------------------------|------------|------------------------------------------------|------------------------------------------------------------------------------------------|
| <span style="color: red;">●</span>         | 15         | clathrin coat, endocytosis                     | AAK1,AP2A2,AP2M1,AP2S1,AP3B1,AP3S1,CLINT1,CLTA,DYSF,EHD2,FCHO2<br>HIP1,ITSN,PICALM,RAB10 |
| <span style="color: orange;">●</span>      | 12         | actin filament polymerization and organization | ACTG1,ACTR3,AFDN,ARPC1A,ARPC3,ARPC5L,CFL2,CTNNA3,CTTN,LMO7<br>MYL6B,MYO5C                |
| <span style="color: brown;">●</span>       | 11         | extracellular matrix organization              | AGRN,BST2,CALR,CCN2,CD44,FN1,HSPG2,PECAM1,SERPINE1,THBS1,VTN                             |
| <span style="color: lightorange;">●</span> | 9          | small GTPase mediated signal transduction      | ARHGDIB,CDC42,CDC42BPA,DOCK10,DOCK9,INF2,ITSN2,MAGI1,RAC2                                |
| <span style="color: tan;">●</span>         | 9          | signal transduction                            | BCR,CIRBP,EPHA2,EPN1,GRB2,KHDRBS1,PTK2,SNX9,SYNJ1                                        |

# Supplementary Figure 2

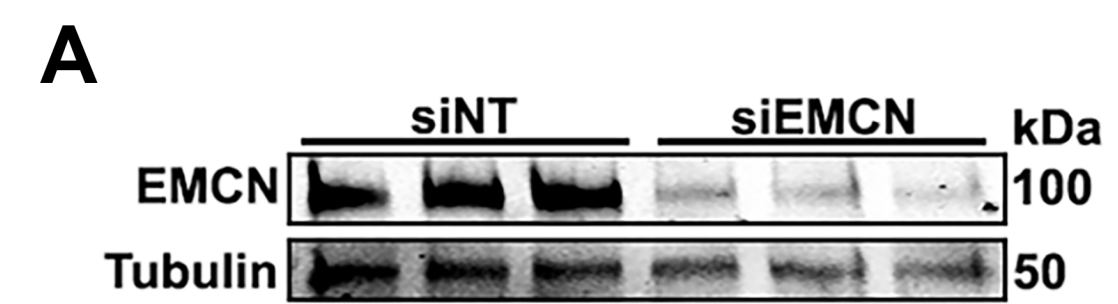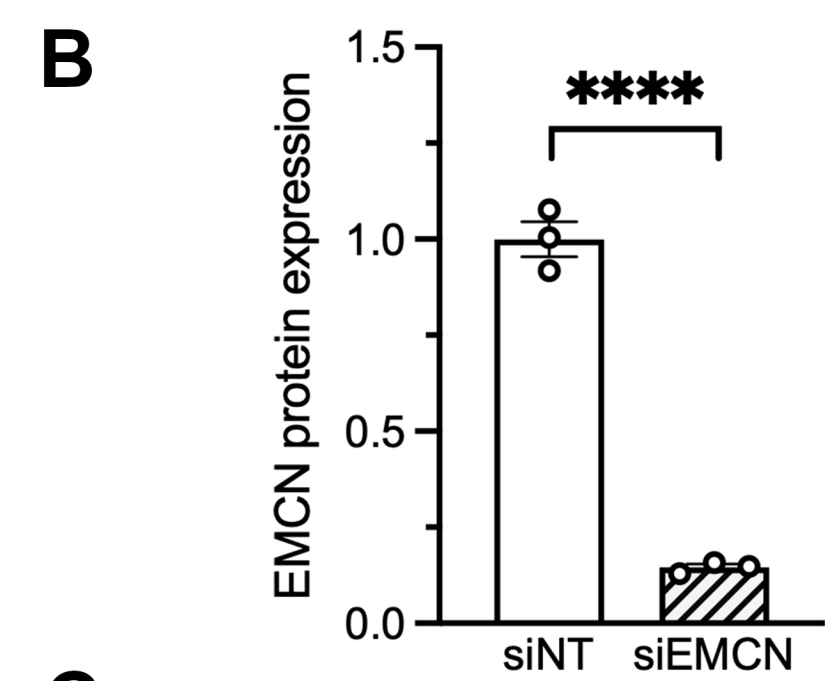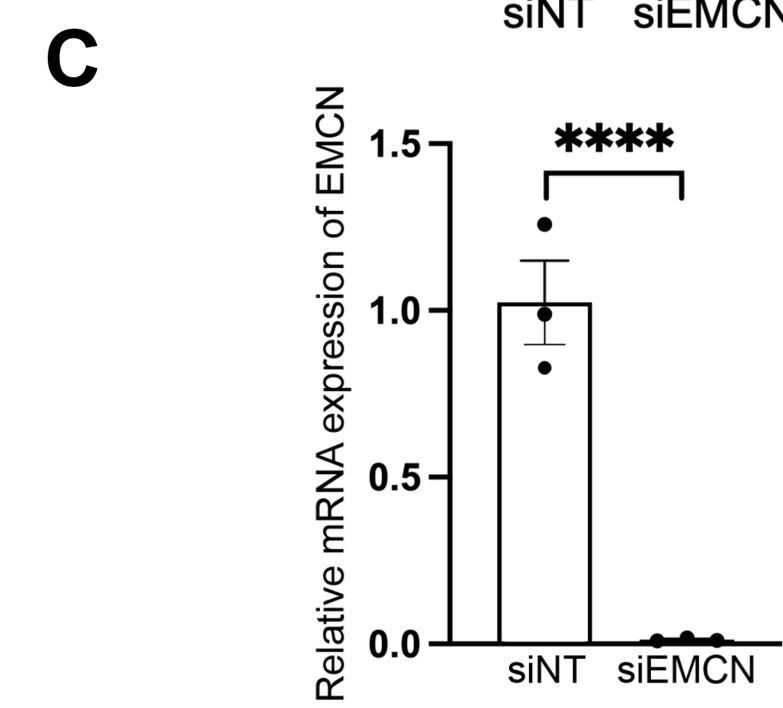

Supplement: 12964_2024_1696_MOESM1_ESM.pdf [file 12964_2024_1696_MOESM1_ESM.pdf]
